# Supplementary material for: Apolipoprotein E Isoform-specific changes related to stress and trauma exposure
Source: PubMed Central journal article supplement (PMC8960860; doi:10.1038/s41398-022-01848-7), 2022-03-28
Supplement: 41398_2022_1848_MOESM3_ESM.pdf [file 41398_2022_1848_MOESM3_ESM.pdf]

**Supplementary Table 2. Additional statistical analyses of percent time spent in each quadrant in during probe trials.**

| Probe Trial 1      |                           |                                        |       |        |        |                   |
|--------------------|---------------------------|----------------------------------------|-------|--------|--------|-------------------|
| Group              | Model                     | Effect                                 | df    | Error  | F      | p                 |
| Female E2 Controls | RM ANOVA                  | Within-subject: Quadrant               | 1.939 | 19.386 | 6.766  | <b>0.006</b>      |
|                    | Mauchly's test: p = 0.049 | Pairwise comparisons                   |       |        |        |                   |
|                    |                           | Target Quadrant vs Right Quadrant :    |       |        |        | <b>0.017</b>      |
|                    |                           | Target Quadrant vs Left Quadrant :     |       |        |        | 0.632             |
|                    |                           | Target Quadrant vs Opposite Quadrant : |       |        |        | 0.53              |
| Female E2 CVS      | RM ANOVA                  | Within-subject: Quadrant               | 1.699 | 18.69  | 1.167  | 0.325             |
|                    | Mauchly's test: p = 0.043 | Pairwise comparisons                   |       |        |        |                   |
|                    |                           | Target Quadrant vs Right Quadrant :    |       |        |        | 0.221             |
|                    |                           | Target Quadrant vs Left Quadrant :     |       |        |        | 0.112             |
|                    |                           | Target Quadrant vs Opposite Quadrant : |       |        |        | 0.997             |
| Female E3 Controls | RM ANOVA                  | Within-subject: Quadrant               | 3     | 33     | 18.146 | <b>&lt; 0.001</b> |
|                    | Mauchly's test: p = 0.192 | Pairwise comparisons                   |       |        |        |                   |
|                    |                           | Target Quadrant vs Right Quadrant :    |       |        |        | 0.145             |
|                    |                           | Target Quadrant vs Left Quadrant :     |       |        |        | <b>&lt; 0.001</b> |
|                    |                           | Target Quadrant vs Opposite Quadrant : |       |        |        | <b>0.001</b>      |
| Female E3 CVS      | RM ANOVA                  | Within-subject: Quadrant               | 3     | 39     | 7.777  | <b>&lt; 0.001</b> |
|                    | Mauchly's test: p = 0.054 | Pairwise comparisons                   |       |        |        |                   |
|                    |                           | Target Quadrant vs Right Quadrant :    |       |        |        | 0.121             |
|                    |                           | Target Quadrant vs Left Quadrant :     |       |        |        | <b>0.008</b>      |
|                    |                           | Target Quadrant vs Opposite Quadrant : |       |        |        | <b>0.001</b>      |
| Female E4 Controls | RM ANOVA                  | Within-subject: Quadrant               | 3     | 33     | 4.311  | <b>0.011</b>      |
|                    | Mauchly's test: p = 0.318 | Pairwise comparisons                   |       |        |        |                   |
|                    |                           | Target Quadrant vs Right Quadrant :    |       |        |        | 0.955             |
|                    |                           | Target Quadrant vs Left Quadrant :     |       |        |        | <b>0.011</b>      |
|                    |                           | Target Quadrant vs Opposite Quadrant : |       |        |        | 0.056             |
| Female E4 CVS      | RM ANOVA                  | Within-subject: Quadrant               | 3     | 30     | 4.863  | <b>0.007</b>      |
|                    | Mauchly's test: p = 0.310 | Pairwise comparisons                   |       |        |        |                   |
|                    |                           | Target Quadrant vs Right Quadrant :    |       |        |        | 0.169             |
|                    |                           | Target Quadrant vs Left Quadrant :     |       |        |        | 0.089             |
|                    |                           | Target Quadrant vs Opposite Quadrant : |       |        |        | 0.17              |
| Male E2 Controls   | RM ANOVA                  | Within-subject: Quadrant               | 3     | 30     | 9.408  | <b>&lt; 0.001</b> |
|                    | Mauchly's test: p = 0.259 | Pairwise comparisons                   |       |        |        |                   |
|                    |                           | Target Quadrant vs Right Quadrant :    |       |        |        | <b>0.001</b>      |
|                    |                           | Target Quadrant vs Left Quadrant :     |       |        |        | 0.622             |
|                    |                           | Target Quadrant vs Opposite Quadrant : |       |        |        | <b>0.013</b>      |
| Male E2 CVS        | RM ANOVA                  | Within-subject: Quadrant               | 3     | 45     | 5.27   | <b>0.003</b>      |
|                    | Mauchly's test: p = 0.096 | Pairwise comparisons                   |       |        |        |                   |
|                    |                           | Target Quadrant vs Right Quadrant :    |       |        |        | 0.854             |
|                    |                           | Target Quadrant vs Left Quadrant :     |       |        |        | 0.053             |
|                    |                           | Target Quadrant vs Opposite Quadrant : |       |        |        | 0.062             |
| Male E3 Controls   | RM ANOVA                  | Within-subject: Quadrant               | 3     | 33     | 24.361 | <b>&lt; 0.001</b> |
|                    | Mauchly's test: p = 0.077 | Pairwise comparisons                   |       |        |        |                   |
|                    |                           | Target Quadrant vs Right Quadrant :    |       |        |        | <b>0.004</b>      |
|                    |                           | Target Quadrant vs Left Quadrant :     |       |        |        | <b>&lt; 0.001</b> |
|                    |                           | Target Quadrant vs Opposite Quadrant : |       |        |        | <b>0.001</b>      |
| Male E3 CVS        | RM ANOVA                  | Within-subject: Quadrant               | 3     | 39     | 12.642 | <b>&lt; 0.001</b> |
|                    | Mauchly's test: p = 0.272 | Pairwise comparisons                   |       |        |        |                   |
|                    |                           | Target Quadrant vs Right Quadrant :    |       |        |        | <b>0.002</b>      |
|                    |                           | Target Quadrant vs Left Quadrant :     |       |        |        | <b>0.008</b>      |
|                    |                           | Target Quadrant vs Opposite Quadrant : |       |        |        | <b>0.005</b>      |
| Male E4 Controls   | RM ANOVA                  | Within-subject: Quadrant               | 1.705 | 18.756 | 4.597  | <b>0.009</b>      |
|                    | Mauchly's test: p = 0.019 | Pairwise comparisons                   |       |        |        |                   |
|                    |                           | Target Quadrant vs Right Quadrant :    |       |        |        | 0.362             |
|                    |                           | Target Quadrant vs Left Quadrant :     |       |        |        | <b>0.001</b>      |
|                    |                           | Target Quadrant vs Opposite Quadrant : |       |        |        | 0.243             |
| Male E4 CVS        | RM ANOVA                  | Within-subject: Quadrant               | 3     | 33     | 17.342 | <b>&lt; 0.001</b> |
|                    | Mauchly's test: p = 0.386 | Pairwise comparisons                   |       |        |        |                   |
|                    |                           | Target Quadrant vs Right Quadrant :    |       |        |        | <b>0.01</b>       |
|                    |                           | Target Quadrant vs Left Quadrant :     |       |        |        | <b>&lt; 0.001</b> |
|                    |                           | Target Quadrant vs Opposite Quadrant : |       |        |        | <b>0.003</b>      |

**Probe Trial 2**

| <b>Model</b>              | <b>Effect</b>                          | <b>df</b> | <b>Error</b> | <b>F</b> | <b>p</b>          |
|---------------------------|----------------------------------------|-----------|--------------|----------|-------------------|
| RM ANOVA                  | <u>Within-subject: Quadrant</u>        | 1.473     | 14.731       | 3.829    | 0.057             |
| Mauchly's test: p = 0.001 | <u>Pairwise comparisons</u>            |           |              |          |                   |
|                           | Target Quadrant vs Right Quadrant :    |           |              |          | 0.186             |
|                           | Target Quadrant vs Left Quadrant :     |           |              |          | 0.999             |
|                           | Target Quadrant vs Opposite Quadrant : |           |              |          | 0.743             |
| RM ANOVA                  | <u>Within-subject: Quadrant</u>        |           |              |          |                   |
| Mauchly's test: p = 0.114 | <u>Pairwise comparisons</u>            |           |              |          |                   |
|                           | Target Quadrant vs Right Quadrant :    |           |              |          | 0.861             |
|                           | Target Quadrant vs Left Quadrant :     |           |              |          | 0.984             |
|                           | Target Quadrant vs Opposite Quadrant : |           |              |          | 0.761             |
| RM ANOVA                  | <u>Within-subject: Quadrant</u>        | 3         | 33           | 7.685    | <b>&lt; 0.001</b> |
| Mauchly's test: p = 0.296 | <u>Pairwise comparisons</u>            |           |              |          |                   |
|                           | Target Quadrant vs Right Quadrant :    |           |              |          | <b>0.048</b>      |
|                           | Target Quadrant vs Left Quadrant :     |           |              |          | 0.988             |
|                           | Target Quadrant vs Opposite Quadrant : |           |              |          | <b>0.019</b>      |
| RM ANOVA                  | <u>Within-subject: Quadrant</u>        | 3         | 39           | 1.883    | 0.148             |
| Mauchly's test: p = 0.664 | <u>Pairwise comparisons</u>            |           |              |          |                   |
|                           | Target Quadrant vs Right Quadrant :    |           |              |          | 0.483             |
|                           | Target Quadrant vs Left Quadrant :     |           |              |          | 0.991             |
|                           | Target Quadrant vs Opposite Quadrant : |           |              |          | 0.999             |
| RM ANOVA                  | <u>Within-subject: Quadrant</u>        | 3         | 33           | 1.539    | 0.223             |
| Mauchly's test: p = 0.049 | <u>Pairwise comparisons</u>            |           |              |          |                   |
|                           | Target Quadrant vs Right Quadrant :    |           |              |          | 0.358             |
|                           | Target Quadrant vs Left Quadrant :     |           |              |          | 1                 |
|                           | Target Quadrant vs Opposite Quadrant : |           |              |          | 0.992             |
| RM ANOVA                  | <u>Within-subject: Quadrant</u>        | 3         | 30           | 3.718    | <b>0.022</b>      |
| Mauchly's test: p = 0.063 | <u>Pairwise comparisons</u>            |           |              |          |                   |
|                           | Target Quadrant vs Right Quadrant :    |           |              |          | <b>0.035</b>      |
|                           | Target Quadrant vs Left Quadrant :     |           |              |          | 0.999             |
|                           | Target Quadrant vs Opposite Quadrant : |           |              |          | 0.974             |
| RM ANOVA                  | <u>Within-subject: Quadrant</u>        | 3         | 30           | 6.962    | <b>0.001</b>      |
| Mauchly's test: p = 0.158 | <u>Pairwise comparisons</u>            |           |              |          |                   |
|                           | Target Quadrant vs Right Quadrant :    |           |              |          | 0.113             |
|                           | Target Quadrant vs Left Quadrant :     |           |              |          | 0.248             |
|                           | Target Quadrant vs Opposite Quadrant : |           |              |          | 0.932             |
| RM ANOVA                  | <u>Within-subject: Quadrant</u>        | 3         | 45           | 3.615    | <b>0.02</b>       |
| Mauchly's test: p = 0.106 | <u>Pairwise comparisons</u>            |           |              |          |                   |
|                           | Target Quadrant vs Right Quadrant :    |           |              |          | 0.807             |
|                           | Target Quadrant vs Left Quadrant :     |           |              |          | 1                 |
|                           | Target Quadrant vs Opposite Quadrant : |           |              |          | <b>0.036</b>      |
| RM ANOVA                  | <u>Within-subject: Quadrant</u>        | 3         | 33           | 12.869   | <b>&lt; 0.001</b> |
| Mauchly's test: p = 0.307 | <u>Pairwise comparisons</u>            |           |              |          |                   |
|                           | Target Quadrant vs Right Quadrant :    |           |              |          | <b>0.003</b>      |
|                           | Target Quadrant vs Left Quadrant :     |           |              |          | 0.518             |
|                           | Target Quadrant vs Opposite Quadrant : |           |              |          | 0.796             |
| RM ANOVA                  | <u>Within-subject: Quadrant</u>        | 1.873     | 24.351       | 6.939    | <b>0.005</b>      |
| Mauchly's test: p = 0.011 | <u>Pairwise comparisons</u>            |           |              |          |                   |
|                           | Target Quadrant vs Right Quadrant :    |           |              |          | 0.513             |
|                           | Target Quadrant vs Left Quadrant :     |           |              |          | <b>0.039</b>      |
|                           | Target Quadrant vs Opposite Quadrant : |           |              |          | 0.679             |
| RM ANOVA                  | <u>Within-subject: Quadrant</u>        | 3         | 33           | 8.168    | <b>&lt; 0.001</b> |
| Mauchly's test: p = 0.102 | <u>Pairwise comparisons</u>            |           |              |          |                   |
|                           | Target Quadrant vs Right Quadrant :    |           |              |          | <b>0.007</b>      |
|                           | Target Quadrant vs Left Quadrant :     |           |              |          | 0.26              |
|                           | Target Quadrant vs Opposite Quadrant : |           |              |          | 0.889             |
| RM ANOVA                  | <u>Within-subject: Quadrant</u>        | 3         | 33           | 2.844    | 0.053             |
| Mauchly's test: p = 0.346 | <u>Pairwise comparisons</u>            |           |              |          |                   |
|                           | Target Quadrant vs Right Quadrant :    |           |              |          | 0.57              |
|                           | Target Quadrant vs Left Quadrant :     |           |              |          | 0.416             |
|                           | Target Quadrant vs Opposite Quadrant : |           |              |          | 0.982             |

**Probe Trial 3**

| <b>Model</b>              | <b>Effect</b>                          | <b>df</b> | <b>Error</b> | <b>F</b> | <b>p</b>          |
|---------------------------|----------------------------------------|-----------|--------------|----------|-------------------|
| RM ANOVA                  | <u>Within-subject: Quadrant</u>        | 3         | 30           | 5.274    | <b>0.045</b>      |
| Mauchly's test: p = 0.406 | <u>Pairwise comparisons</u>            |           |              |          |                   |
|                           | Target Quadrant vs Right Quadrant :    |           |              |          | 0.997             |
|                           | Target Quadrant vs Left Quadrant :     |           |              |          | 0.733             |
|                           | Target Quadrant vs Opposite Quadrant : |           |              |          | 0.171             |
| RM ANOVA                  | <u>Within-subject: Quadrant</u>        | 3         | 33           | 6.15     | <b>0.002</b>      |
| Mauchly's test: p = 0.152 | <u>Pairwise comparisons</u>            |           |              |          |                   |
|                           | Target Quadrant vs Right Quadrant :    |           |              |          | 1                 |
|                           | Target Quadrant vs Left Quadrant :     |           |              |          | 0.949             |
|                           | Target Quadrant vs Opposite Quadrant : |           |              |          | <b>0.002</b>      |
| RM ANOVA                  | <u>Within-subject: Quadrant</u>        | 1.669     | 18.357       | 3.262    | 0.069             |
| Mauchly's test: p = 0.022 | <u>Pairwise comparisons</u>            |           |              |          |                   |
|                           | Target Quadrant vs Right Quadrant :    |           |              |          | 1                 |
|                           | Target Quadrant vs Left Quadrant :     |           |              |          | 1                 |
|                           | Target Quadrant vs Opposite Quadrant : |           |              |          | 0.52              |
| RM ANOVA                  | <u>Within-subject: Quadrant</u>        | 3         | 39           | 6.272    | <b>0.001</b>      |
| Mauchly's test: p = 0.074 | <u>Pairwise comparisons</u>            |           |              |          |                   |
|                           | Target Quadrant vs Right Quadrant :    |           |              |          | 0.991             |
|                           | Target Quadrant vs Left Quadrant :     |           |              |          | 0.884             |
|                           | Target Quadrant vs Opposite Quadrant : |           |              |          | 0.084             |
| RM ANOVA                  | <u>Within-subject: Quadrant</u>        | 3         | 33           | 0.769    | 0.519             |
| Mauchly's test: p = 0.166 | <u>Pairwise comparisons</u>            |           |              |          |                   |
|                           | Target Quadrant vs Right Quadrant :    |           |              |          | 1                 |
|                           | Target Quadrant vs Left Quadrant :     |           |              |          | 1                 |
|                           | Target Quadrant vs Opposite Quadrant : |           |              |          | 0.916             |
| RM ANOVA                  | <u>Within-subject: Quadrant</u>        | 3         | 30           | 3.701    | <b>0.022</b>      |
| Mauchly's test: p = 0.468 | <u>Pairwise comparisons</u>            |           |              |          |                   |
|                           | Target Quadrant vs Right Quadrant :    |           |              |          | 0.901             |
|                           | Target Quadrant vs Left Quadrant :     |           |              |          | 0.245             |
|                           | Target Quadrant vs Opposite Quadrant : |           |              |          | 0.066             |
| RM ANOVA                  | <u>Within-subject: Quadrant</u>        | 3         | 30           | 2.474    | 0.081             |
| Mauchly's test: p = 0.739 | <u>Pairwise comparisons</u>            |           |              |          |                   |
|                           | Target Quadrant vs Right Quadrant :    |           |              |          | 0.99              |
|                           | Target Quadrant vs Left Quadrant :     |           |              |          | 0.811             |
|                           | Target Quadrant vs Opposite Quadrant : |           |              |          | 0.625             |
| RM ANOVA                  | <u>Within-subject: Quadrant</u>        | 2         | 45           | 1.457    | 0.239             |
| Mauchly's test: p = 0.299 | <u>Pairwise comparisons</u>            |           |              |          |                   |
|                           | Target Quadrant vs Right Quadrant :    |           |              |          | 1                 |
|                           | Target Quadrant vs Left Quadrant :     |           |              |          | 0.901             |
|                           | Target Quadrant vs Opposite Quadrant : |           |              |          | 0.357             |
| RM ANOVA                  | <u>Within-subject: Quadrant</u>        | 3         | 33           | 2.707    | 0.061             |
| Mauchly's test: p = 0.252 | <u>Pairwise comparisons</u>            |           |              |          |                   |
|                           | Target Quadrant vs Right Quadrant :    |           |              |          | 0.196             |
|                           | Target Quadrant vs Left Quadrant :     |           |              |          | 0.813             |
|                           | Target Quadrant vs Opposite Quadrant : |           |              |          | 0.966             |
| RM ANOVA                  | <u>Within-subject: Quadrant</u>        | 3         | 39           | 5.355    | <b>0.003</b>      |
| Mauchly's test: p = 0.054 | <u>Pairwise comparisons</u>            |           |              |          |                   |
|                           | Target Quadrant vs Right Quadrant :    |           |              |          | 0.847             |
|                           | Target Quadrant vs Left Quadrant :     |           |              |          | 1                 |
|                           | Target Quadrant vs Opposite Quadrant : |           |              |          | 0.103             |
| RM ANOVA                  | <u>Within-subject: Quadrant</u>        | 3         | 33           | 15.771   | <b>&lt; 0.001</b> |
| Mauchly's test: p = 0.276 | <u>Pairwise comparisons</u>            |           |              |          |                   |
|                           | Target Quadrant vs Right Quadrant :    |           |              |          | 1                 |
|                           | Target Quadrant vs Left Quadrant :     |           |              |          | 0.984             |
|                           | Target Quadrant vs Opposite Quadrant : |           |              |          | <b>0.004</b>      |
| RM ANOVA                  | <u>Within-subject: Quadrant</u>        | 1.78      | 19.581       | 3.174    | 0.069             |
| Mauchly's test: p < 0.001 | <u>Pairwise comparisons</u>            |           |              |          |                   |
|                           | Target Quadrant vs Right Quadrant :    |           |              |          | 0.426             |
|                           | Target Quadrant vs Left Quadrant :     |           |              |          | 0.878             |
|                           | Target Quadrant vs Opposite Quadrant : |           |              |          | 0.051             |
